# Supplementary material
Source: PubMed Central journal article supplement (PMC3992207)
Supplement: ajnmmi0004-0114-f7.pdf [file ajnmmi0004-0114-f7.pdf]

## Supporting information

**Scheme S1.** Synthesis of CyRLA library from CyR compounds.

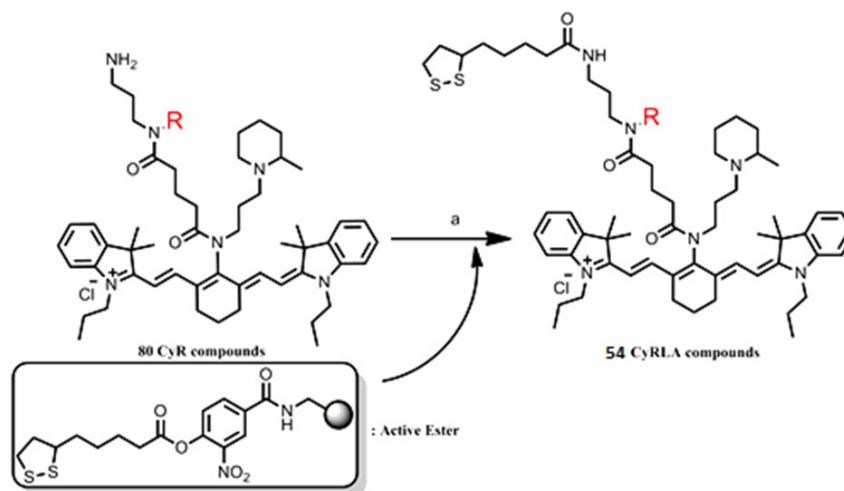

Reagents and conditions: (a) DCM/ACN (7:1), NaHCO<sub>3</sub>, r.t., 6 h.

# Multiplex SERS nanotags for teratoma detection

Chart S1. CyRLA compound structures.

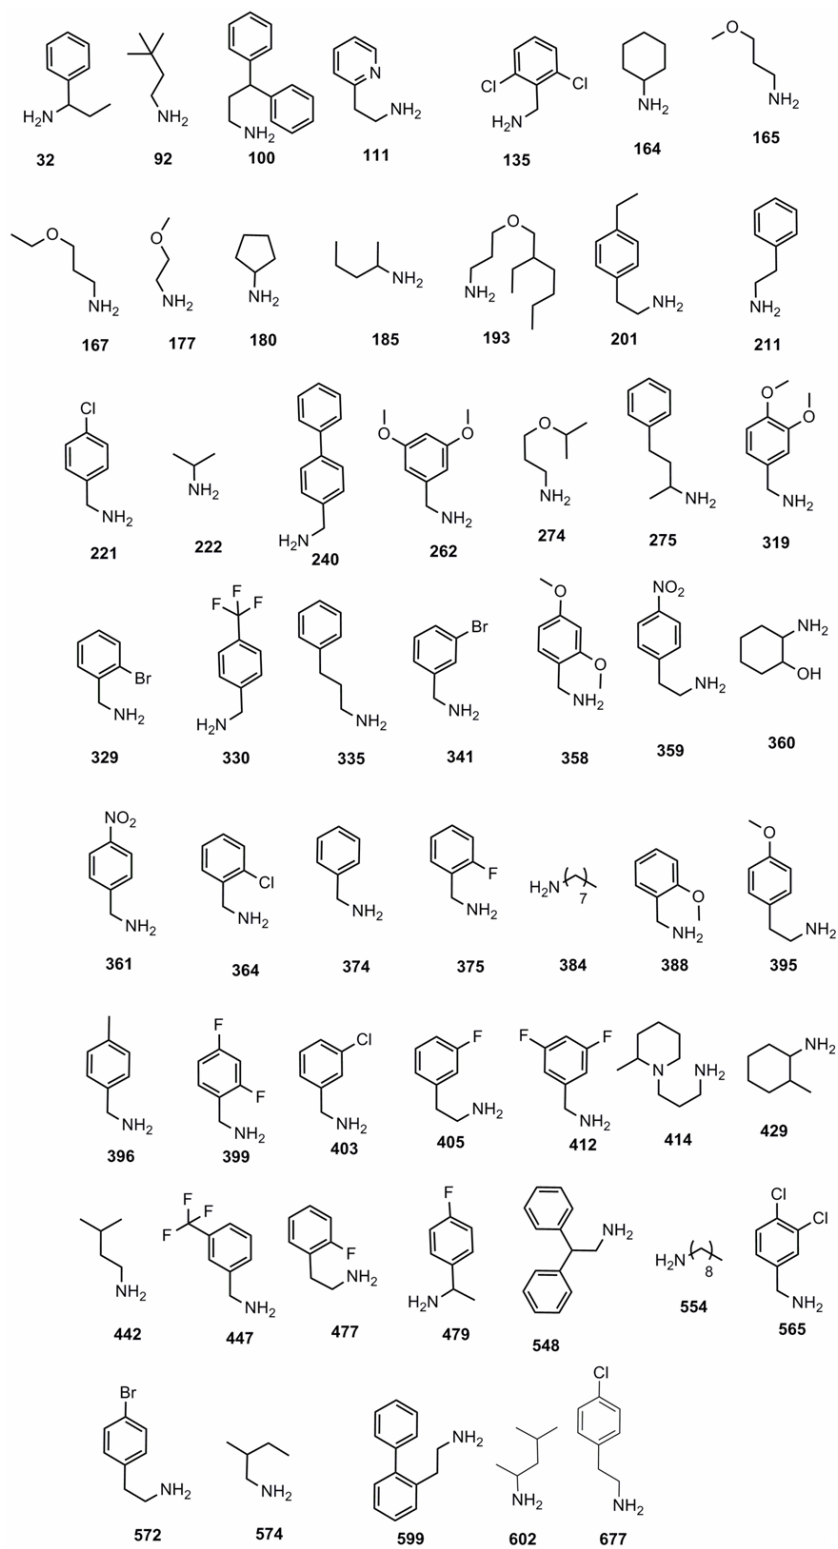

## Multiplex SERS nanotags for teratoma detection

**Table S1.** Characterization by HPLC-MS and photophysical property of CyRLA library

| Compound Code | M <sup>+</sup> (calc.) | M <sup>+</sup> (exp.) <sup>a</sup> | Purity (%) <sup>b</sup> | $\lambda_{\text{abs}}/\text{nm}$ | $\lambda_{\text{emr}}/\text{nm}$ |
|---------------|------------------------|------------------------------------|-------------------------|----------------------------------|----------------------------------|
| CyRLA-677     | 1155.7                 | 1155.6                             | 90                      | 803                              | 820                              |
| CyRLA-599     | 1197.7                 | 1197.6                             | 94                      | 803                              | 820                              |
| CyRLA-396     | 1121.7                 | 1121.6                             | 82                      | 803                              | 821                              |
| CyRLA-221     | 1141.7                 | 1141.6                             | 84                      | 805                              | 820                              |
| CyRLA-358     | 1137.7                 | 1137.6                             | 93                      | 804                              | 822                              |
| CyRLA-574     | 1087.7                 | 1087.6                             | 90                      | 802                              | 820                              |
| CyRLA-262     | 1167.7                 | 1167.6                             | 86                      | 803                              | 820                              |
| CyRLA-565     | 1175.6                 | 1175.5                             | 93                      | 801                              | 819                              |
| CyRLA-330     | 1175.7                 | 1175.5                             | 92                      | 804                              | 820                              |
| CyRLA-329     | 1185.6                 | 1185.7                             | 89                      | 802                              | 823                              |
| CyRLA-335     | 1135.7                 | 1135.6                             | 93                      | 801                              | 820                              |
| CyRLA-388     | 1137.7                 | 1137.6                             | 92                      | 802                              | 819                              |
| CyRLA-399     | 1143.7                 | 1143.6                             | 92                      | 803                              | 820                              |
| CyRLA-479     | 1139.7                 | 1139.6                             | 93                      | 804                              | 823                              |
| CyRLA-548     | 1197.7                 | 1197.6                             | 82                      | 803                              | 820                              |
| CyRLA-222     | 1059.7                 | 1059.6                             | 90                      | 802                              | 821                              |
| CyRLA-447     | 1175.7                 | 1175.6                             | 81                      | 803                              | 822                              |
| CyRLA-360     | 1129.7                 | 1129.6                             | 91                      | 804                              | 823                              |
| CyRLA-319     | 1167.7                 | 1167.6                             | 89                      | 801                              | 820                              |
| CyRLA-240     | 1183.7                 | 1183.6                             | 92                      | 802                              | 820                              |
| CyRLA-193     | 1187.8                 | 1187.7                             | 93                      | 803                              | 819                              |
| CyRLA-384     | 1129.8                 | 1129.7                             | 83                      | 802                              | 820                              |
| CyRLA-275     | 1149.7                 | 1149.6                             | 84                      | 804                              | 820                              |
| CyRLA-92      | 1101.7                 | 1101.7                             | 89                      | 801                              | 820                              |
| CyRLA-111     | 1122.7                 | 1122.6                             | 72                      | 803                              | 821                              |
| CyRLA-165     | 1089.7                 | 1089.6                             | 89                      | 802                              | 820                              |
| CyRLA-167     | 1103.7                 | 1103.6                             | 92                      | 803                              | 822                              |
| CyRLA-405     | 1139.7                 | 1139.6                             | 93                      | 801                              | 820                              |
| CyRLA-341     | 1185.6                 | 1185.5                             | 92                      | 803                              | 820                              |
| CyRLA-414     | 1156.8                 | 1156.7                             | 93                      | 801                              | 819                              |
| CyRLA-477     | 1139.7                 | 1139.6                             | 92                      | 803                              | 820                              |
| CyRLA-554     | 1143.8                 | 1143.7                             | 93                      | 802                              | 823                              |
| CyRLA-572     | 1199.6                 | 1199.5                             | 92                      | 805                              | 820                              |
| CyRLA-100     | 1211.8                 | 1211.7                             | 91                      | 803                              | 819                              |
| CyRLA-180     | 1085.7                 | 1085.6                             | 92                      | 804                              | 820                              |
| CyRLA-211     | 1121.7                 | 1121.6                             | 93                      | 803                              | 823                              |
| CyRLA-274     | 1117.7                 | 1117.6                             | 92                      | 802                              | 820                              |
| CyRLA-359     | 1166.7                 | 1166.6                             | 90                      | 803                              | 821                              |
| CyRLA-403     | 1141.7                 | 1041.6                             | 91                      | 802                              | 822                              |
| CyRLA-442     | 1087.7                 | 11087.7                            | 92                      | 803                              | 823                              |
| CyRLA-602     | 1101.7                 | 1101.6                             | 85                      | 804                              | 820                              |
| CyRLA-32      | 1121.7                 | 1121.6                             | 89                      | 802                              | 820                              |
| CyRLA-177     | 1075.7                 | 1075.6                             | 81                      | 803                              | 821                              |
| CyRLA-361     | 1152.7                 | 1152.6                             | 82                      | 802                              | 820                              |
| CyRLA-375     | 1125.7                 | 1125.6                             | 75                      | 804                              | 822                              |
| CyRLA-412     | 1143.7                 | 1143.6                             | 85                      | 803                              | 820                              |
| CyRLA-429     | 1113.7                 | 1113.6                             | 90                      | 803                              | 820                              |

## Multiplex SERS nanotags for teratoma detection

|           |        |        |    |     |     |
|-----------|--------|--------|----|-----|-----|
| CyRLA-135 | 1175.6 | 1175.5 | 92 | 801 | 819 |
| CyRLA-201 | 1149.7 | 1149.6 | 92 | 804 | 820 |
| CyRLA-374 | 1107.7 | 1107.6 | 91 | 805 | 823 |
| CyRLA-364 | 1141.7 | 1141.6 | 92 | 802 | 820 |
| CyRLA-185 | 1087.7 | 1087.6 | 92 | 801 | 819 |
| CyRLA-164 | 1099.7 | 1099.6 | 89 | 802 | 820 |
| CyRLA-395 | 1151.7 | 1151.6 | 85 | 803 | 823 |

<sup>a</sup>ESI-MS  $m/z$  corresponding to  $[M^+]$  values. <sup>b</sup>Purities were determined by integration of the UV absorbance signal at 780 nm. 54-member CyRLA compounds were characterized by HPLC-MS analysis. The purities of the whole library were determined by integration of the UV absorbance signal at 780 nm. The spectra of 10  $\mu$ M in DMSO solution was recorded in SpectraMax M2 plate reader.

### Characterization data of representative CyRLA compounds

#### CyRLA-442 (7 mg, 20%)

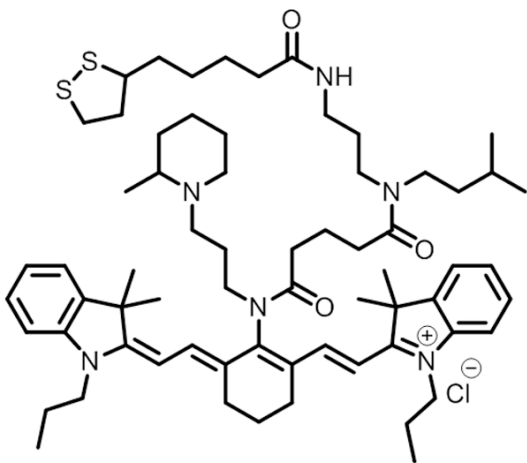

<sup>1</sup>H-NMR (500 MHz, CDCl<sub>3</sub>):  $\delta$  0.87-1.60 (m, 18 H), 1.65 (s, 6 H), 1.66 (s, 6 H), 1.7-1.92 (m, 14 H), 2.14-2.72 (m, 12 H), 3.03-3.28 (m, 11 H), 3.48-3.72 (m, 13 H), 4.0-4.1 (m, 6 H), 6.12 (d, 1 H,  $J=13.5$  Hz), 6.24 (d, 1 H,  $J=13.5$  Hz), 7.04-7.44 (m, 8 H), 7.52 (d, 1H,  $J=13$  Hz), 7.55 (d, 1H,  $J=13$  Hz).

ESI-MS  $m/z$  ( $M^+$ ), calc'd: 1087.7, found 1087.4.

#### CyRLA-572 (9 mg, 17%)

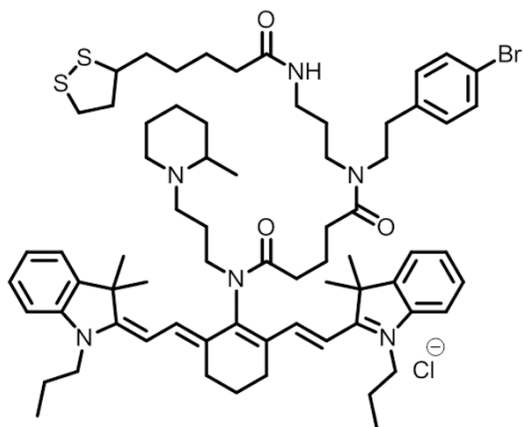

## Multiplex SERS nanotags for teratoma detection

$^1\text{H-NMR}$  (500 MHz,  $\text{CDCl}_3$ ):  $\delta$  1.06-1.62 (m, 18 H), 1.66 (s, 6 H), 1.68 (s, 6 H), 1.69-2.06 (m, 9 H), 2.18-2.78 (m, 10 H), 3.04-3.31 (m, 11 H), 3.44-3.73 (m, 13 H), 3.93-4.06 (m, 6 H), 6.14 (d, 1 H,  $J=14.5$  Hz), 6.17 (d, 1 H,  $J=14.5$  Hz), 6.99-7.43 (m, 12 H), 7.53 (d, 1 H,  $J=14.5$  Hz), 7.56 (d, 1 H,  $J=14.5$  Hz). ESI-MS  $m/z$  ( $M^+$ ), calc'd: 1199.6, found 1201.1 (due to bromine isotope).

**CyRLA-364** (7.5 mg, 15%)

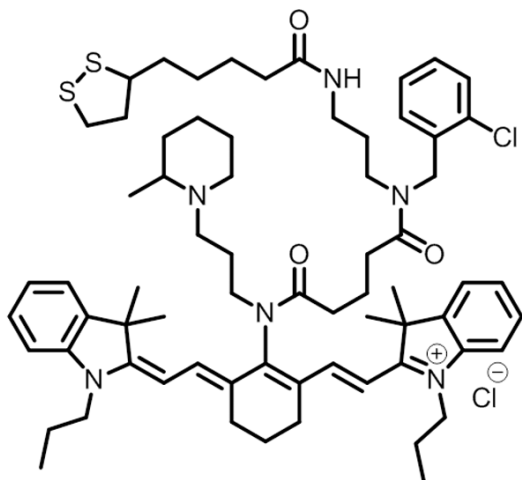

$^1\text{H-NMR}$  (500 MHz,  $\text{CDCl}_3$ ):  $\delta$  1.06-1.62 (m, 18 H), 1.67 (s, 6 H), 1.68 (s, 6 H), 1.70-1.92 (m, 9 H), 1.99-2.46 (m, 10 H), 2.52-2.62 (m, 6 H), 2.72 (m, 2 H), 3.0-3.72 (m, 15 H), 4.0-4.12 (m, 6 H), 4.53 (s, 2 H), 6.10 (d, 1 H,  $J=14.5$  Hz), 6.16 (d, 1 H,  $J=14.5$  Hz), 7.07-7.49 (m, 12 H), 7.52 (d, 1 H,  $J=15$  Hz), 7.55 (d, 1 H,  $J=15$  Hz). ESI-MS  $m/z$  ( $M^+$ ), calc'd: 1141.7, found 1141.4.

**CyRLA-335** (8.2 mg, 18%)

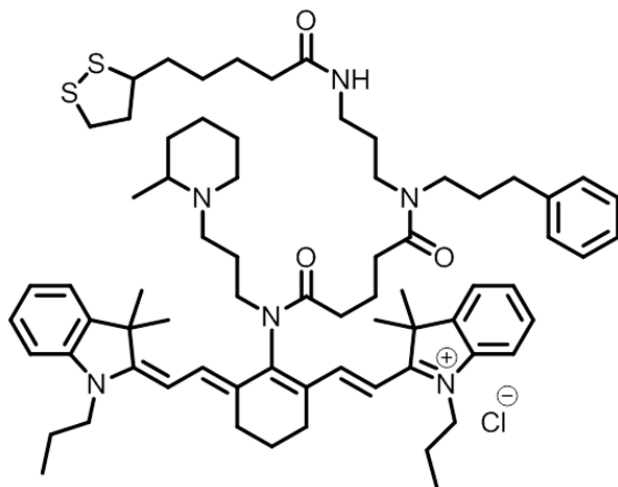

$^1\text{H-NMR}$  (500 MHz,  $\text{CDCl}_3$ ):  $\delta$  1.09-1.57 (m, 18 H), 1.61 (s, 6 H), 1.63 (s, 6 H), 1.71-2.03 (m, 11 H), 2.16-2.80 (m, 10 H), 3.05-3.33 (m, 11 H), 3.54-3.76 (m, 13 H), 3.96-4.17 (m, 6 H), 6.14 (d, 1 H,  $J=13.5$  Hz), 6.17 (d, 1 H,  $J=13.5$  Hz), 7.09-7.45 (m, 13 H), 7.56 (d, 1 H,  $J=13.5$  Hz), 7.59 (d, 1 H,  $J=13.5$  Hz). ESI-MS  $m/z$  ( $M^+$ ), calc'd: 1135.7, found 1135.6.

**CyRLA-240** (6 mg, 12%)

## Multiplex SERS nanotags for teratoma detection

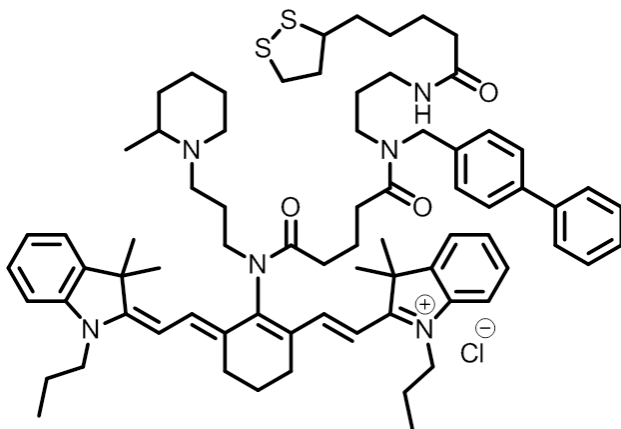

$^1\text{H-NMR}$  (500 MHz,  $\text{CDCl}_3$ ):  $\delta$  1.04-1.51 (m, 16 H), 1.62 (s, 6 H), 1.64 (s, 6 H), 1.69-1.90 (m, 8 H), 1.99-2.43 (m, 10 H), 2.50-2.61 (m, 6 H), 2.76 (m, 2 H), 3.05-3.74 (m, 15 H), 3.97-4.13 (m, 6 H), 4.64 (s, 2 H), 6.10 (d, 1 H,  $J=14$  Hz), 6.16 (d, 1 H,  $J=14$  Hz), 7.05-7.53 (m, 17 H), 7.54 (d, 1 H,  $J=13.5$  Hz), 7.57 (d, 1 H,  $J=13.5$  Hz). ESI-MS  $m/z$  ( $\text{M}^+$ ), calc'd: 1183.7, found 1183.6.

SERS spectra of different Raman reporters

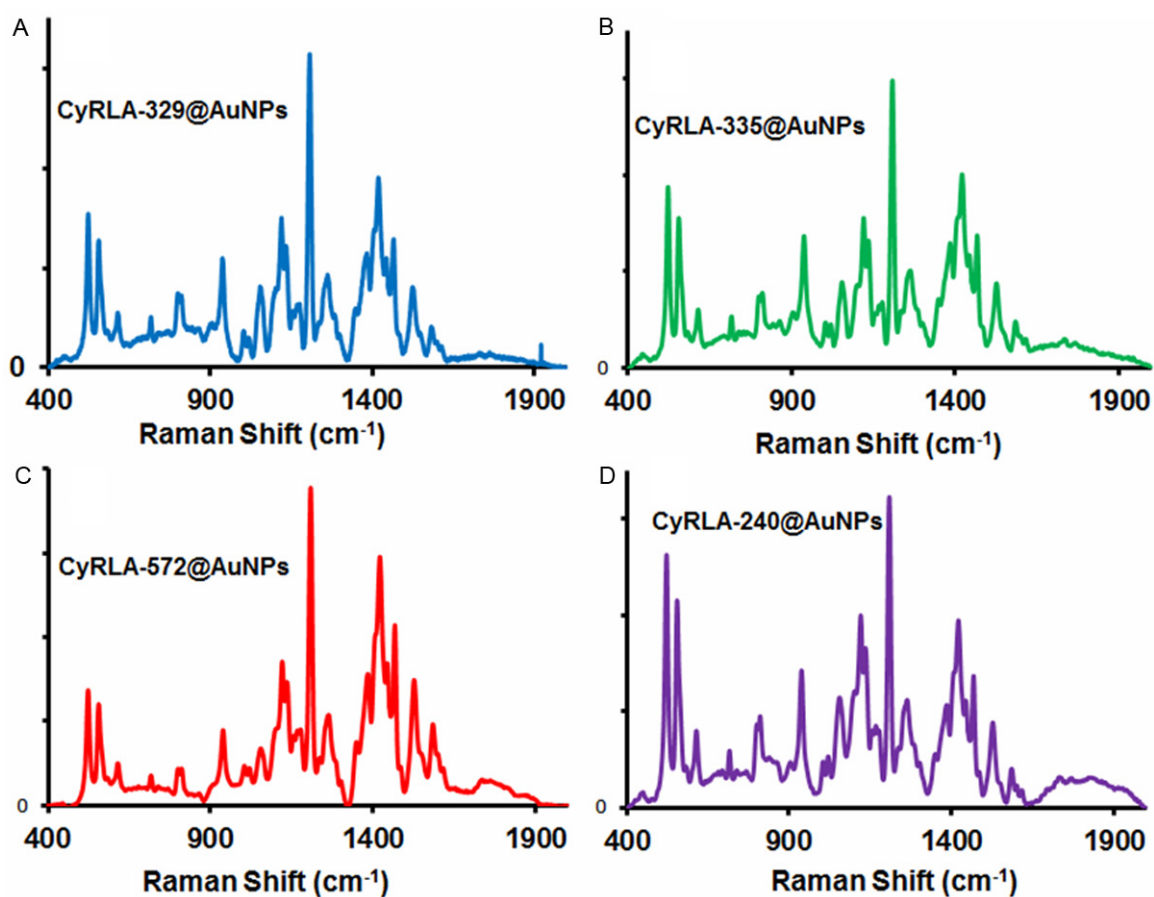

**Figure S1.** Normalized SERS spectra of CyRLA-329, CyRLA-335, CyRLA-240 and CyRLA-572 after chemisorption on 60 nm gold nanoparticle. Spectra were measured in a Raman microscope (785 nm laser excitation, 1.2 mW laser power, and acquisition time: 10 s).

## Multiplex SERS nanotags for teratoma detection

SERS measurement of three different Raman reporters

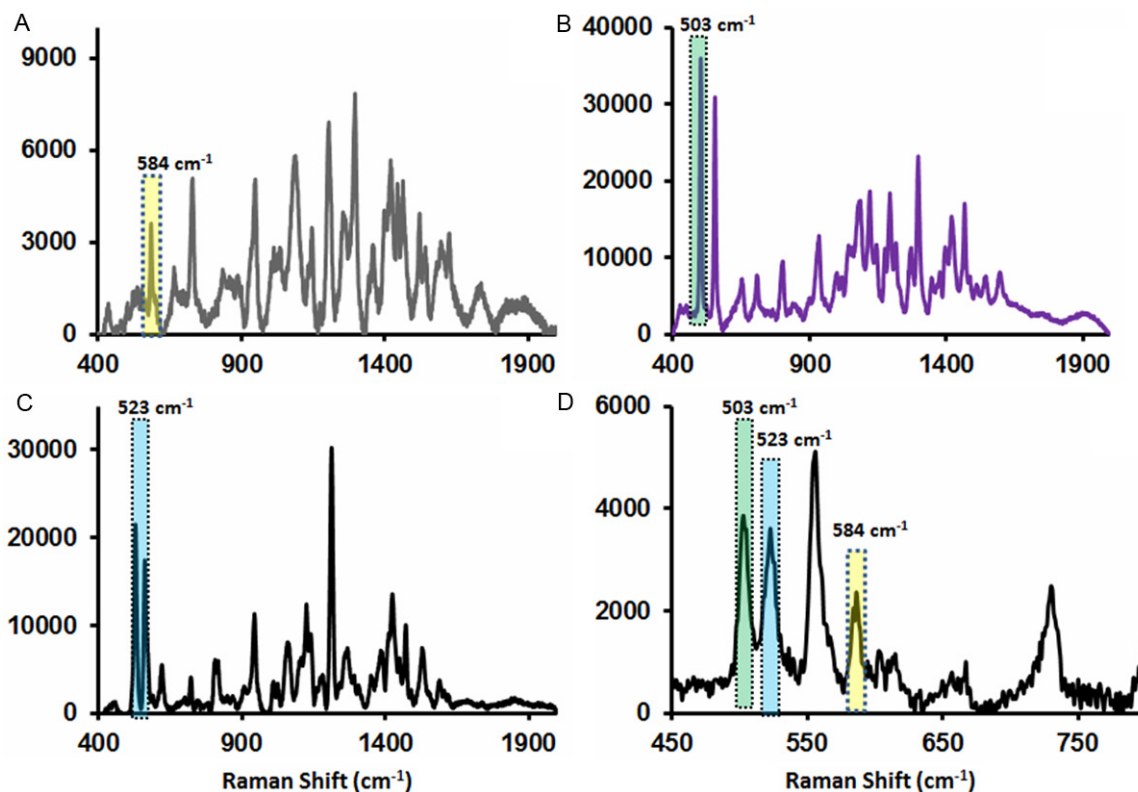

**Figure S2.** Normalized SERS spectra of (A) Cy7.5LA, (B) Cy7LA, (C) CyRLA-572 and (D) mixture of three (Cy7.5LA, Cy7LA, CyRLA-572) after chemisorption on 60 nm gold nanoparticle. Spectra were measured in a Raman microscope (785 nm laser excitation, 1.2 mW laser power, and acquisition time: 10 s. SERS spectra was measured in low concentration when all three AuNPs-Reporters were mixed.

UV-Vis spectroscopy

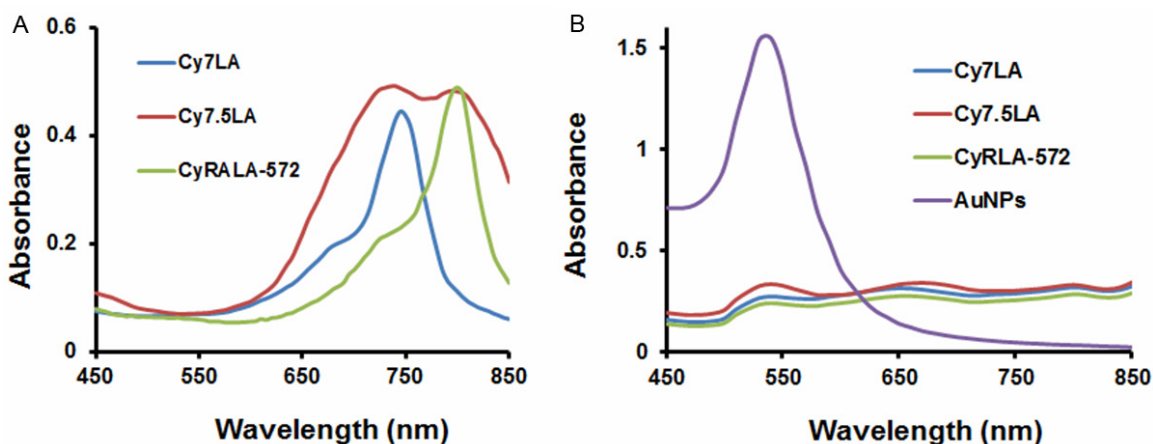

**Figure S3.** A: UV-Vis-NIR electronic absorbance of Raman reporters (Cy7LA, Cy7.5LA and CyRLA-572; 20  $\mu$ M in de-ionized water. B: UV-Vis-NIR surface Plasmon resonance (SPR) of citrate stabilized gold nanoparticles with NIR or without Raman reporters.

## Multiplex SERS nanotags for teratoma detection

Mixed PEG coating of SERS nanoparticles and stability study

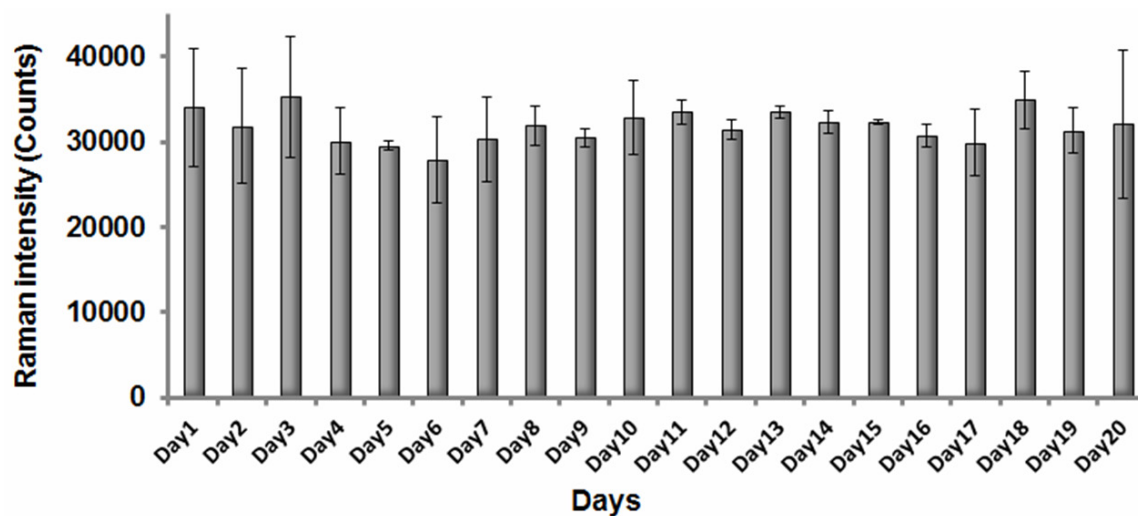

**Figure S4.** Time course SERS measurement of CyRLA-572@AuNPs@PEG in deionized water. SERS intensities of the highest Raman peaks (i.e.  $523\text{ cm}^{-1}$ ) are plotted as means  $\pm$  standard deviation of 5 independent measurements taken from the same sample at different time points.

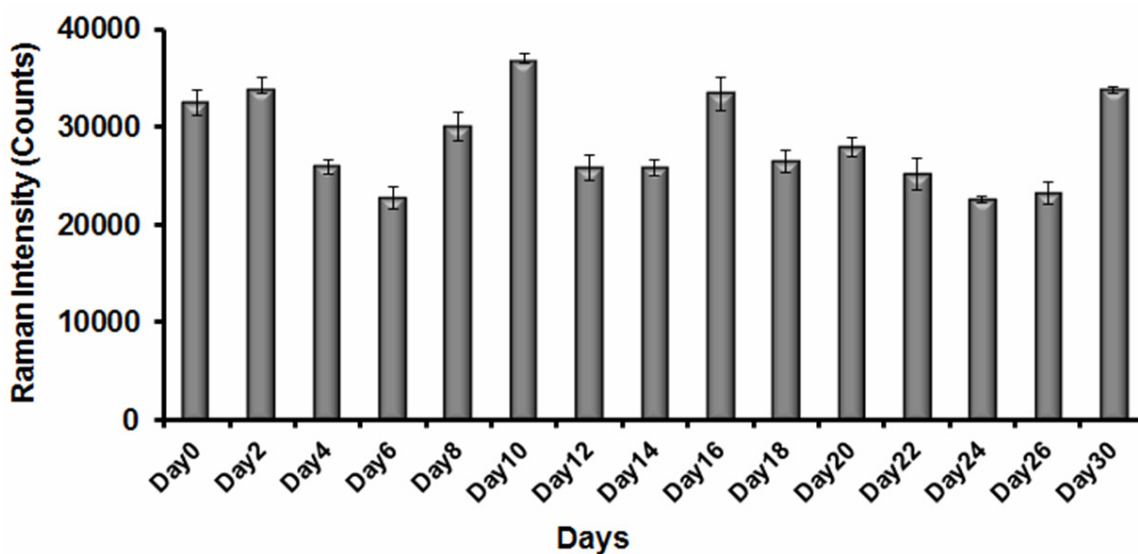

**Figure S5.** Time course SERS measurement of CyRLA-240@AuNPs@PEG in deionized water. SERS intensities of the highest Raman peaks (i.e.  $523\text{ cm}^{-1}$ ) are plotted as means  $\pm$  standard deviation of 3 independent measurements taken from the same sample at different time points.



## Multiplex SERS nanotags for teratoma detection

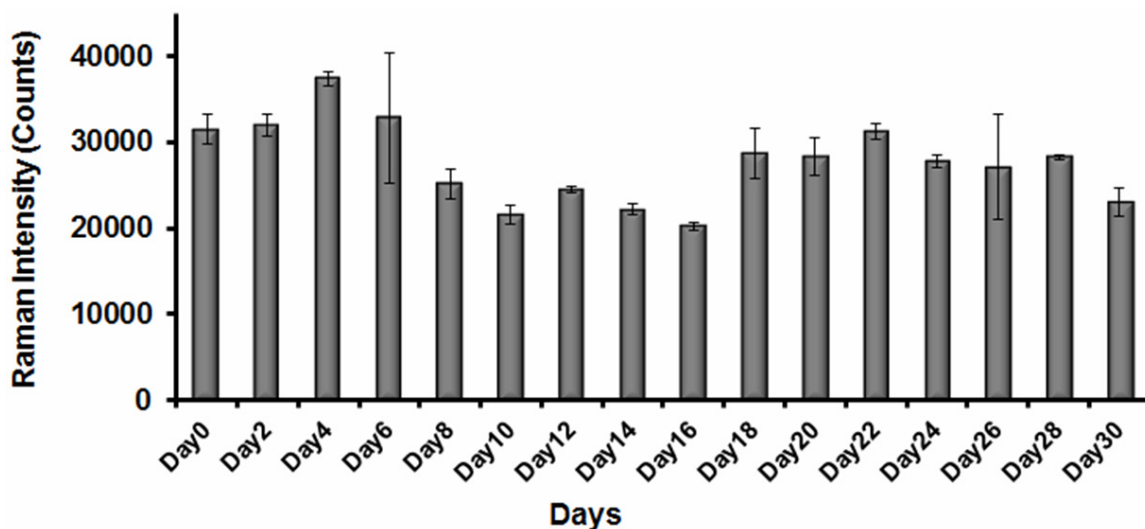

**Figure S6.** Time course SERS measurement of Cy7LA-364@AuNPs@PEG in deionized water. SERS intensities of the highest Raman peaks (i.e.  $523\text{ cm}^{-1}$ ) are plotted as means  $\pm$  standard deviation of 3 independent measurements taken from the same sample at different time points.

### Transmission electron microscopy

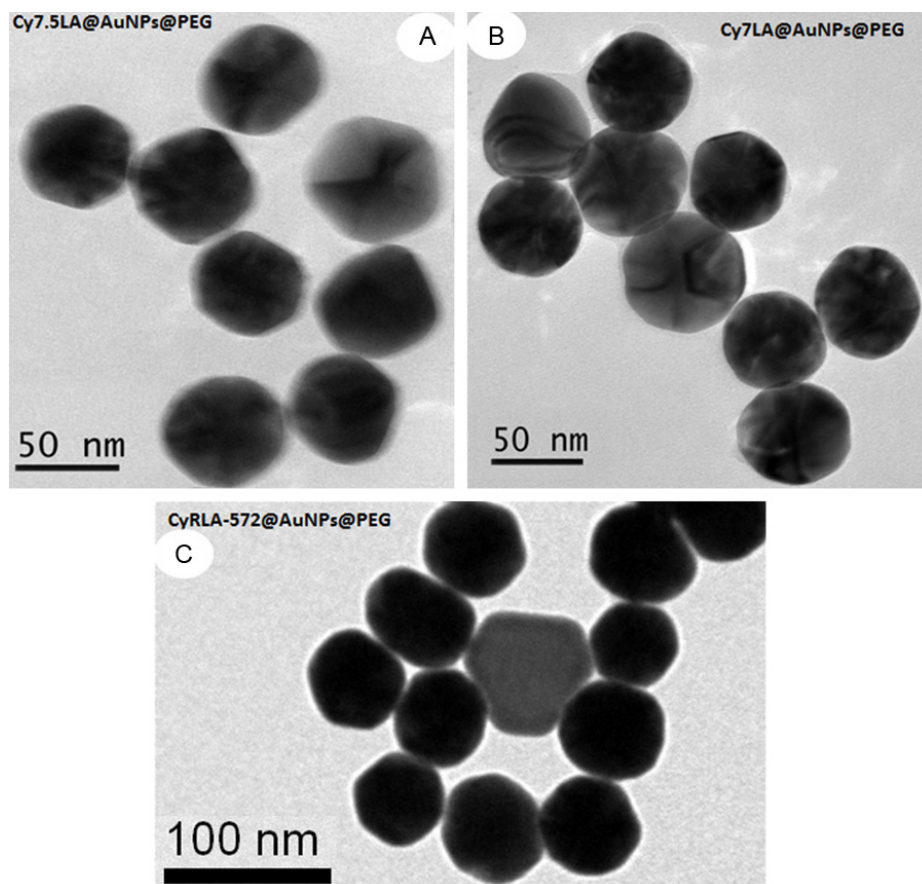

**Figure S7.** Transmission electron microscopy (TEM) images of: A: PEG-coated Cy7.5LA@AuNPs@PEG; B: Cy7LA; C: Cy7LA-572 nanotag; Scale bar: 50 nm for Cy7 and Cy7.5.

## Multiplex SERS nanotags for teratoma detection

### Antibody conjugation to SERS nanotags

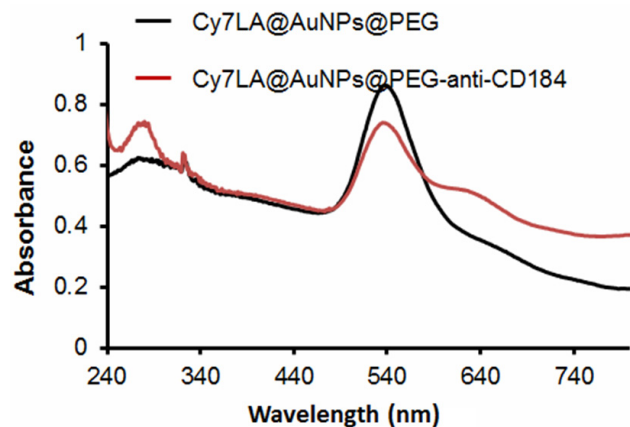

**Figure S8.** Surface plasmon resonance spectra of Cy7LA@AuNPs@PEG nanotags before and after conjugation of antibody.

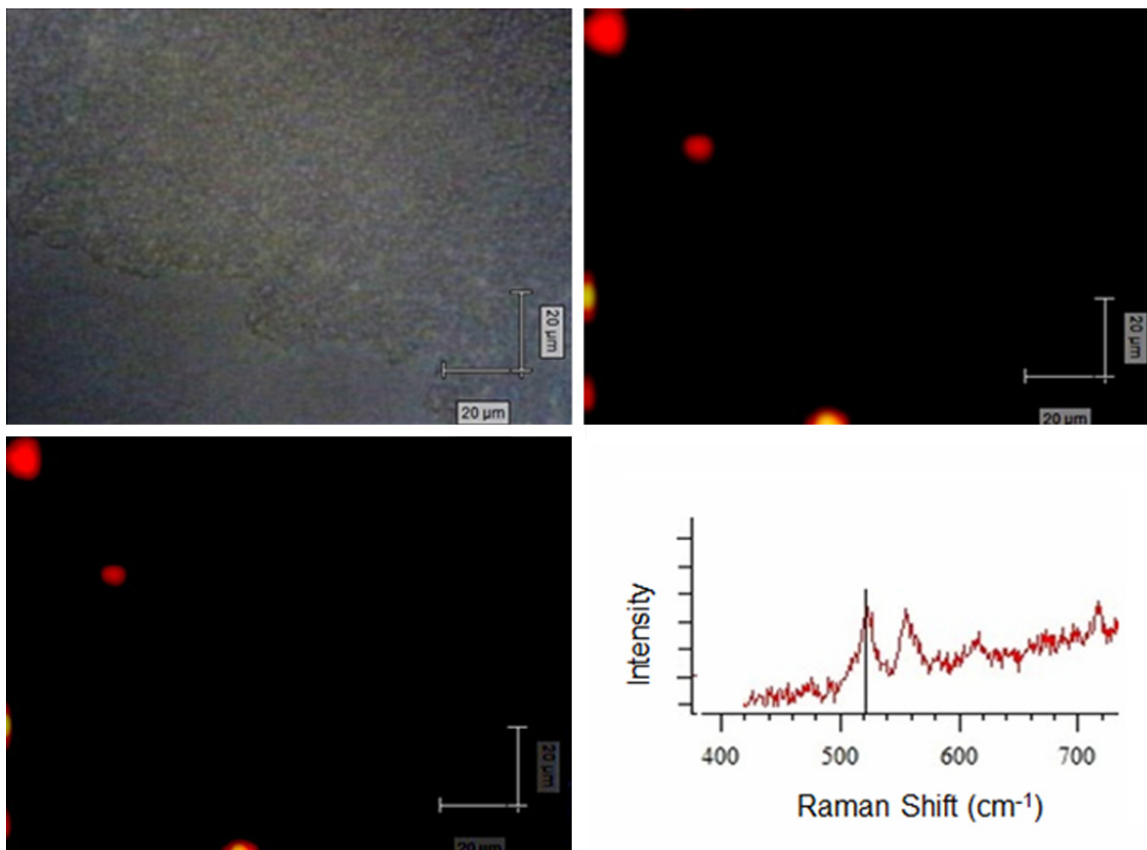

**Figure S9.** Bright field, SERS mapping images, merged images and complementary SERS spectra of differentiated mouse embryonic stem cells (mESC) treated with Cy7LA-572@AuNPs@PEG. The mapping experiments were scanned at multiplex peaks of corresponding nanotags (523 cm<sup>-1</sup>) at an interval of 2 μm (785 nm excitation) and the intensities were normalized between the lowest (0) and the highest color (1) values. Scale bar: 20 μm.

## Multiplex SERS nanotags for teratoma detection

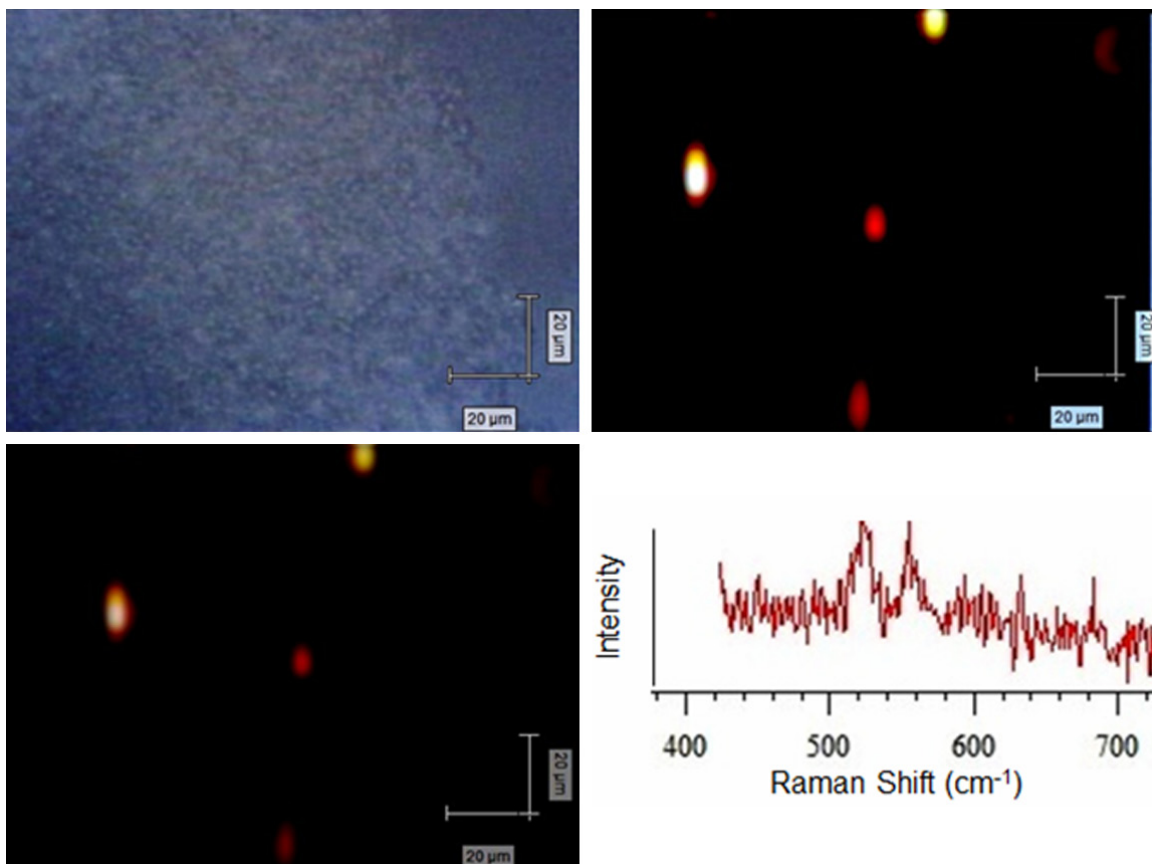

**Figure S10.** Bright field, SERS mapping images, merged images and complementary SERS spectra of differentiated mouse embryonic stem cells (mESC) treated with AuNPs@Cy7LA@PEG-anti-HER2. The mapping experiments were scanned at multiplex peaks of corresponding nanotags ( $523\text{ cm}^{-1}$ ) at an interval of  $2\text{ }\mu\text{m}$  ( $785\text{ nm}$  excitation) and the intensities were normalized between the lowest (0) and the highest color (1) values. Scale bar:  $20\text{ }\mu\text{m}$ .

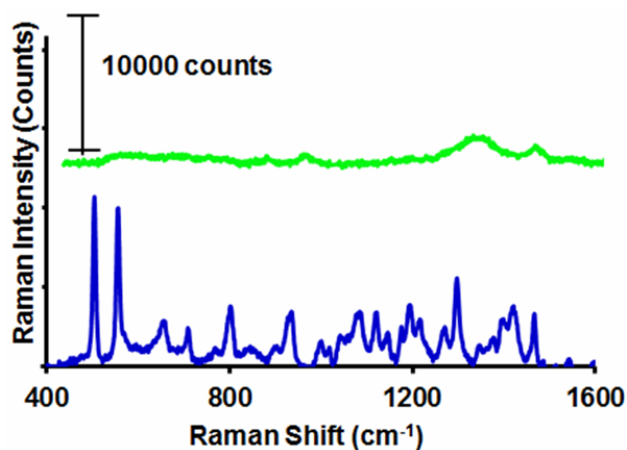

**Figure S11.** *In vivo* spectra from liver site after injection of pegylated AUNPs i.e Cy7LA@AuNPs@PEG. The spectra were scanned at an interval of  $2\text{ }\mu\text{m}$  ( $785\text{ nm}$  excitation wavelength) and the intensities were normalized after baseline corrections; acquisition time:  $30\text{ s}$ .

## Multiplex SERS nanotags for teratoma detection

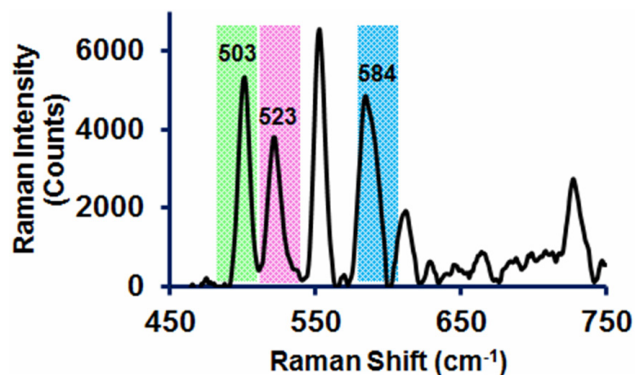

**Figure S12.** *In vivo* spectra from liver site after injection of mixture of three nanotags i.e Cy7LA@AuNPs@PEG-anti-CD184, Cy7.5LA@AuNPs@PEG-anti-Notch1 and Cy7LA-572@AuNPs@PEG-anti-CD34 nanotags. The spectra were scanned at an interval of 2  $\mu\text{m}$  (785 nm excitation wavelength) and the intensities were normalized after baseline corrections; acquisition time: 30 s.

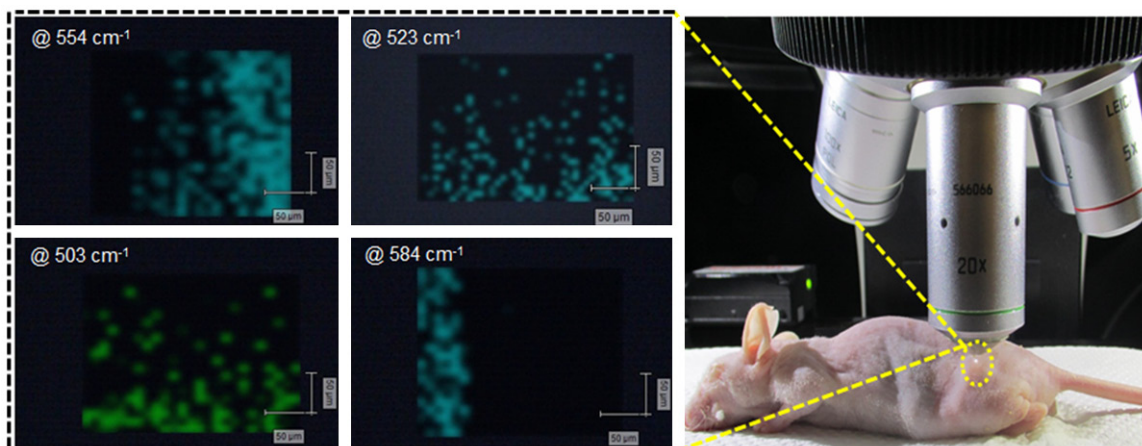

**Figure S13.** *In vivo* imaging of teratoma in animal model. Three different multiplexed peaks i.e 503  $\text{cm}^{-1}$ , 523  $\text{cm}^{-1}$ , and 584  $\text{cm}^{-1}$  and one common peak 554  $\text{cm}^{-1}$  for Cy7LA and Cy7LA-572 were applied to scan the teratoma location for getting the images.
